# Supplementary material for: Suicide Overall and Suicide by Pesticide Rates among South Korean Workers: A 15-Year Population-Based Study
Source: PubMed Central journal article supplement (PMC6926852; doi:10.3390/ijerph16234866), 2019-12-03
Supplement: ijerph-16-04866-s001.pdf [file ijerph-16-04866-s001.pdf]

**Supplementary Table S1.** The number of suicide deaths (X60-X84 and Y87.0) from the National Death Records.

| Year | MNP  |        | OST  |        | AFF  |        | SKL  |        | USL  |        |
|------|------|--------|------|--------|------|--------|------|--------|------|--------|
|      | Male | Female | Male | Female | Male | Female | Male | Female | Male | Female |
| 2003 | 83   | 19     | 1084 | 239    | 632  | 133    | 637  | 48     | 351  | 25     |
| 2004 | 94   | 31     | 1125 | 228    | 617  | 127    | 626  | 27     | 371  | 29     |
| 2005 | 127  | 34     | 1087 | 337    | 550  | 114    | 588  | 33     | 313  | 29     |
| 2006 | 101  | 27     | 1011 | 238    | 445  | 92     | 487  | 28     | 261  | 14     |
| 2007 | 117  | 62     | 1029 | 413    | 438  | 83     | 491  | 70     | 230  | 38     |
| 2008 | 322  | 121    | 1075 | 484    | 377  | 82     | 410  | 28     | 301  | 37     |
| 2009 | 526  | 189    | 1465 | 586    | 385  | 74     | 479  | 25     | 394  | 36     |
| 2010 | 585  | 168    | 1530 | 518    | 399  | 69     | 447  | 18     | 354  | 33     |
| 2011 | 529  | 161    | 1613 | 478    | 397  | 66     | 523  | 16     | 387  | 30     |
| 2012 | 598  | 129    | 1387 | 445    | 330  | 57     | 518  | 26     | 487  | 62     |
| 2013 | 768  | 164    | 1432 | 444    | 333  | 46     | 616  | 22     | 599  | 69     |
| 2014 | 757  | 172    | 1443 | 440    | 251  | 34     | 580  | 36     | 674  | 66     |
| 2015 | 728  | 137    | 1276 | 425    | 242  | 33     | 608  | 29     | 631  | 50     |
| 2016 | 762  | 149    | 1197 | 452    | 218  | 22     | 555  | 29     | 634  | 56     |
| 2017 | 727  | 134    | 1159 | 414    | 205  | 24     | 513  | 17     | 555  | 55     |

The number of deaths where the population is assumed to be 1,000,000. **MNP:** Manager-Professional, **OST:** Officer-Service-Trade, **AFF:** Agriculture-Forestry-Fishery, **SKL:** Skilled manual labor, **USL:** Unskilled manual labor.

**Supplementary Table S2.** The number of suicide by pesticide deaths (X68) from the National Death Records.

| Year | MNP  |        | OST  |        | AFF  |        | SKL  |        | USL  |        |
|------|------|--------|------|--------|------|--------|------|--------|------|--------|
|      | Male | Female | Male | Female | Male | Female | Male | Female | Male | Female |
| 2003 | 14   | 5      | 260  | 102    | 373  | 83     | 159  | 16     | 116  | 10     |
| 2004 | 11   | 4      | 262  | 70     | 395  | 95     | 160  | 9      | 113  | 12     |
| 2005 | 17   | 2      | 183  | 47     | 334  | 81     | 127  | 6      | 70   | 7      |
| 2006 | 13   | 2      | 152  | 38     | 267  | 65     | 88   | 2      | 75   | 3      |
| 2007 | 15   | 0      | 151  | 34     | 286  | 56     | 92   | 5      | 50   | 10     |
| 2008 | 33   | 6      | 139  | 52     | 220  | 58     | 65   | 5      | 67   | 11     |
| 2009 | 55   | 8      | 138  | 43     | 226  | 51     | 61   | 2      | 73   | 13     |
| 2010 | 38   | 6      | 122  | 35     | 214  | 42     | 52   | 2      | 77   | 1      |
| 2011 | 47   | 7      | 122  | 38     | 206  | 47     | 51   | 4      | 68   | 6      |
| 2012 | 30   | 3      | 86   | 20     | 156  | 38     | 38   | 1      | 55   | 14     |
| 2013 | 27   | 3      | 43   | 10     | 119  | 22     | 30   | 1      | 45   | 4      |
| 2014 | 16   | 2      | 33   | 7      | 75   | 15     | 25   | 0      | 41   | 3      |
| 2015 | 14   | 0      | 23   | 12     | 53   | 8      | 25   | 1      | 27   | 1      |
| 2016 | 14   | 0      | 21   | 13     | 49   | 6      | 14   | 0      | 40   | 2      |
| 2017 | 11   | 3      | 21   | 11     | 32   | 8      | 14   | 0      | 23   | 3      |

The number of deaths where the population is assumed to be 1,000,000. **MNP**: Manager-Professional, **OST**: Officer-Service-Trade, **AFF**: Agriculture-Forestry-Fishery, **SKL**: Skilled manual labor, **USL**: Unskilled manual labor.

**Supplementary Table S3.** The population of occupational groups by year from the Economically Active Population Survey over the 15-year period.

| Year | MNP     |         | OST     |         | AFF    |        | SKL     |         | USL     |         |
|------|---------|---------|---------|---------|--------|--------|---------|---------|---------|---------|
|      | Male    | Female  | Male    | Female  | Male   | Female | Male    | Female  | Male    | Female  |
| 2003 | 1416366 | 758807  | 3736911 | 4603379 | 673080 | 538538 | 5323204 | 1345619 | 1345619 | 931470  |
| 2004 | 1402319 | 764276  | 3604332 | 4745807 | 612265 | 481796 | 5578237 | 1388949 | 1388949 | 953944  |
| 2005 | 1427875 | 835402  | 3564362 | 4824317 | 574224 | 442298 | 5634970 | 1366142 | 1366142 | 957545  |
| 2006 | 1485375 | 893099  | 3533974 | 4847189 | 543584 | 418502 | 5744805 | 1443863 | 1443863 | 999205  |
| 2007 | 1536126 | 909955  | 3511449 | 4813705 | 514680 | 397462 | 5828770 | 1457291 | 1457291 | 1028269 |
| 2008 | 2892005 | 1881010 | 4040574 | 4834054 | 519899 | 373508 | 4120572 | 657398  | 657398  | 1309338 |
| 2009 | 2862506 | 1945590 | 4136313 | 4711741 | 518592 | 348941 | 4003530 | 596796  | 596796  | 1356741 |
| 2010 | 2959296 | 2006115 | 4082339 | 4756056 | 512236 | 311105 | 4152483 | 632603  | 632603  | 1383719 |
| 2011 | 2953249 | 2080690 | 4274737 | 4795345 | 491427 | 309958 | 4222596 | 638798  | 638798  | 1414997 |
| 2012 | 2949986 | 2142967 | 4435744 | 4905671 | 491964 | 293775 | 4310774 | 662441  | 662441  | 1368808 |
| 2013 | 2943066 | 2259586 | 4546437 | 4906101 | 473743 | 299599 | 4352094 | 670038  | 670038  | 1359967 |
| 2014 | 3001838 | 2356167 | 4640935 | 5092370 | 450309 | 275499 | 4430609 | 670709  | 670709  | 1337800 |
| 2015 | 2938253 | 2416791 | 4615835 | 4849419 | 391237 | 123747 | 4549522 | 649861  | 649861  | 1346261 |
| 2016 | 2971747 | 2458347 | 4643951 | 4925424 | 370040 | 96734  | 4565729 | 644122  | 644122  | 1326425 |
| 2017 | 2970653 | 2558240 | 4694370 | 5002555 | 386429 | 81976  | 4529558 | 647376  | 647376  | 1296265 |

MNP: Manager-Professional, OST: Officer-Service-Trade, AFF: Agriculture-Forestry-Fishery, SKL: Skilled manual labor, USL: Unskilled manual labor.

**Supplementary Table S4.** The crude suicide and suicide by pesticide crude rates of the population age 15-64 by sex, including workers and non-workers, per 1,000,000.

| Year <sup>1</sup> | Suicide Rate |        | Suicide by Pesticide Rate |        |
|-------------------|--------------|--------|---------------------------|--------|
|                   | Male         | Female | Male                      | Female |
| 2003              | 303.1        | 103.1  | 90.2                      | 41.5   |
| 2004              | 309.2        | 103.6  | 93.5                      | 38.7   |
| 2005              | 310.8        | 128.7  | 76.5                      | 31.0   |
| 2006              | 276.4        | 100.5  | 61.4                      | 25.9   |
| 2007              | 286.9        | 150.3  | 62.0                      | 23.6   |
| 2008              | 300.5        | 155.2  | 56.5                      | 23.0   |
| 2009              | 374.7        | 183.3  | 52.7                      | 21.3   |
| 2010              | 380.3        | 171.7  | 50.7                      | 17.1   |
| 2011              | 402.9        | 159.2  | 46.5                      | 19.5   |
| 2012              | 354.3        | 134.1  | 35.1                      | 14.7   |
| 2013              | 350.8        | 129.2  | 21.1                      | 7.9    |
| 2014              | 346.3        | 126.1  | 15.7                      | 5.0    |
| 2015              | 321.9        | 111.4  | 12.9                      | 4.0    |
| 2016              | 312.7        | 117.0  | 12.1                      | 4.5    |
| 2017              | 301.7        | 108.8  | 9.5                       | 4.5    |

**Supplementary Table S5.** The suicide overall crude rates of the population age 15-64 by age, including workers and non-workers, per 1,000,000.

| Year | Suicide Rate |       |       |       |       |       |       |       |       |       |
|------|--------------|-------|-------|-------|-------|-------|-------|-------|-------|-------|
|      | 15-19        | 20-24 | 25-29 | 30-34 | 35-39 | 40-44 | 45-49 | 50-54 | 55-59 | 60-64 |
| 2003 | 47.7         | 104.6 | 147.3 | 186.8 | 214.5 | 249.8 | 232.5 | 263.0 | 308.1 | 407.1 |
| 2004 | 33.5         | 91.5  | 126.1 | 155.3 | 214.7 | 256.4 | 267.6 | 296.6 | 346.3 | 440.5 |
| 2005 | 46.1         | 130.3 | 171.8 | 189.2 | 211.0 | 235.7 | 283.5 | 307.1 | 319.5 | 454.8 |
| 2006 | 34.2         | 84.4  | 136.2 | 131.1 | 175.6 | 202.0 | 257.1 | 307.5 | 326.1 | 396.0 |
| 2007 | 46.4         | 131.9 | 213.8 | 198.2 | 201.1 | 222.2 | 272.5 | 305.4 | 325.2 | 394.9 |
| 2008 | 41.0         | 158.7 | 245.8 | 205.7 | 258.6 | 237.0 | 286.3 | 255.7 | 288.4 | 331.8 |
| 2009 | 56.1         | 164.0 | 284.0 | 286.8 | 300.1 | 287.6 | 332.4 | 361.8 | 340.1 | 411.5 |
| 2010 | 40.1         | 145.6 | 266.2 | 273.6 | 278.8 | 299.2 | 347.1 | 357.8 | 379.2 | 415.6 |
| 2011 | 45.1         | 137.5 | 257.7 | 275.2 | 278.6 | 310.3 | 319.6 | 391.0 | 414.2 | 442.7 |
| 2012 | 38.1         | 107.0 | 187.1 | 256.5 | 227.6 | 286.6 | 290.4 | 340.2 | 373.0 | 389.1 |
| 2013 | 39.4         | 94.9  | 172.4 | 257.4 | 258.0 | 296.6 | 287.8 | 345.7 | 300.7 | 309.4 |
| 2014 | 42.6         | 94.3  | 180.1 | 243.2 | 247.3 | 294.8 | 291.2 | 344.8 | 291.1 | 294.5 |
| 2015 | 29.7         | 94.0  | 147.0 | 201.8 | 219.0 | 255.4 | 277.3 | 300.0 | 304.3 | 312.3 |
| 2016 | 40.4         | 93.7  | 154.4 | 205.4 | 212.1 | 254.2 | 263.9 | 277.9 | 309.3 | 319.0 |
| 2017 | 33.2         | 95.2  | 149.8 | 174.5 | 225.4 | 220.3 | 271.9 | 265.5 | 294.9 | 305.5 |

**Supplementary Table S6.** The suicide by pesticide crude rates of the population age 15-64 by age, including workers and non-workers, per 1,000,000.

| Year | Suicide by Pesticide Rate |       |       |       |       |       |       |       |       |       |
|------|---------------------------|-------|-------|-------|-------|-------|-------|-------|-------|-------|
|      | 15-19                     | 20-24 | 25-29 | 30-34 | 35-39 | 40-44 | 45-49 | 50-54 | 55-59 | 60-64 |
| 2003 | 9.4                       | 21.8  | 39.8  | 53.0  | 68.3  | 79.6  | 80.5  | 91.1  | 118.1 | 160.4 |
| 2004 | 5.8                       | 19.1  | 26.4  | 37.6  | 58.6  | 79.1  | 90.5  | 108.9 | 142.2 | 181.6 |
| 2005 | 4.5                       | 10.1  | 19.3  | 32.2  | 48.1  | 58.7  | 73.8  | 89.0  | 100.5 | 186.9 |
| 2006 | 2.6                       | 5.5   | 11.2  | 19.3  | 33.6  | 45.8  | 66.1  | 84.1  | 104.5 | 140.3 |
| 2007 | 1.6                       | 4.9   | 11.7  | 16.6  | 31.4  | 45.4  | 63.3  | 81.3  | 102.7 | 151.4 |
| 2008 | 2.6                       | 6.9   | 11.6  | 17.9  | 34.6  | 45.3  | 59.7  | 56.9  | 84.9  | 104.9 |
| 2009 | 2.0                       | 7.2   | 7.6   | 14.1  | 26.3  | 32.2  | 56.5  | 68.7  | 78.1  | 109.1 |
| 2010 | 0.9                       | 2.0   | 7.3   | 16.8  | 22.2  | 31.5  | 53.0  | 57.1  | 73.7  | 105.9 |
| 2011 | 1.2                       | 4.6   | 7.1   | 11.1  | 19.0  | 29.8  | 40.8  | 66.3  | 79.2  | 105.9 |
| 2012 | 2.0                       | 1.6   | 2.3   | 8.1   | 12.2  | 21.8  | 32.4  | 50.3  | 60.0  | 87.5  |
| 2013 | 0.3                       | 0.8   | 0.3   | 3.1   | 6.4   | 9.9   | 19.1  | 27.2  | 32.6  | 48.2  |
| 2014 | 0.3                       | 0.8   | 0.6   | 3.1   | 3.6   | 7.1   | 12.5  | 21.1  | 22.5  | 34.0  |
| 2015 | 0.3                       | 0.6   | 0.6   | 1.8   | 2.0   | 3.5   | 9.6   | 16.2  | 22.2  | 31.2  |
| 2016 | 0.3                       | 0.3   | 1.2   | 1.0   | 2.3   | 4.6   | 8.7   | 11.7  | 24.0  | 33.0  |
| 2017 | 0.3                       | 0.3   | 0.3   | 0.8   | 0.8   | 3.2   | 6.8   | 10.8  | 18.4  | 32.6  |

**Supplementary Table S7.** The suicide overall crude rates of the population age 15-64 by occupational groups per 1,000,000.

| Year | MNP   |        | OST   |        | AFF    |        | SKL   |        | USL   |        |
|------|-------|--------|-------|--------|--------|--------|-------|--------|-------|--------|
|      | Male  | Female | Male  | Female | Male   | Female | Male  | Female | Male  | Female |
| 2003 | 58.6  | 25     | 290.1 | 51.9   | 939    | 247    | 119.7 | 35.7   | 326   | 26.8   |
| 2004 | 67    | 40.6   | 312.1 | 48     | 1007.7 | 263.6  | 112.2 | 19.4   | 332.3 | 30.4   |
| 2005 | 88.9  | 40.7   | 305   | 69.9   | 957.8  | 257.7  | 104.3 | 24.2   | 281.6 | 30.3   |
| 2006 | 68    | 30.2   | 286.1 | 49.1   | 818.6  | 219.8  | 84.8  | 19.4   | 232.5 | 14     |
| 2007 | 76.2  | 68.1   | 293   | 85.8   | 851    | 208.8  | 84.2  | 48     | 193.3 | 37     |
| 2008 | 111.3 | 64.3   | 266.1 | 100.1  | 725.1  | 219.5  | 99.5  | 42.6   | 238   | 28.3   |
| 2009 | 183.8 | 97.1   | 354.2 | 124.4  | 742.4  | 212.1  | 119.6 | 41.9   | 307.3 | 26.5   |
| 2010 | 197.7 | 83.7   | 374.8 | 108.9  | 778.9  | 221.8  | 107.6 | 28.5   | 271.2 | 23.8   |
| 2011 | 179.1 | 77.4   | 377.3 | 99.7   | 807.9  | 212.9  | 123.9 | 25     | 293.8 | 21.2   |
| 2012 | 202.7 | 60.2   | 312.7 | 90.7   | 670.8  | 194    | 120.2 | 39.2   | 387.3 | 45.3   |
| 2013 | 261   | 72.6   | 315   | 90.5   | 702.9  | 153.5  | 141.5 | 32.8   | 484.1 | 50.7   |
| 2014 | 252.2 | 73     | 310.9 | 86.4   | 557.4  | 123.4  | 130.9 | 53.7   | 525   | 49.3   |
| 2015 | 247.8 | 56.7   | 276.4 | 87.6   | 618.6  | 266.7  | 133.6 | 44.6   | 481.1 | 37.1   |
| 2016 | 256.4 | 60.6   | 257.8 | 91.8   | 589.1  | 227.4  | 121.6 | 45     | 494   | 42.2   |
| 2017 | 244.7 | 52.4   | 246.9 | 82.8   | 530.5  | 292.8  | 113.3 | 26.3   | 409.4 | 42.4   |

MNP: Manager-Professional, OST: Officer-Service-Trade, AFF: Agriculture-Forestry-Fishery, SKL: Skilled manual labor, USL: Unskilled manual labor.

**Supplementary Table S8.** The suicide by pesticide crude rates of the population age 15-64 by occupational groups per 1,000,000.

| Year | MNP  |        | OST  |        | AFF   |        | SKL  |        | USL   |        |
|------|------|--------|------|--------|-------|--------|------|--------|-------|--------|
|      | Male | Female | Male | Female | Male  | Female | Male | Female | Male  | Female |
| 2003 | 9.9  | 6.6    | 69.6 | 22.2   | 554.2 | 154.1  | 29.9 | 11.9   | 107.7 | 10.7   |
| 2004 | 7.8  | 5.2    | 72.7 | 14.7   | 645.1 | 197.2  | 28.7 | 6.5    | 101.2 | 12.6   |
| 2005 | 11.9 | 2.4    | 51.3 | 9.7    | 581.7 | 183.1  | 22.5 | 4.4    | 63    | 7.3    |
| 2006 | 8.8  | 2.2    | 43   | 7.8    | 491.2 | 155.3  | 15.3 | 1.4    | 66.8  | 3      |
| 2007 | 9.8  | 0      | 43   | 7.1    | 555.7 | 140.9  | 15.8 | 3.4    | 42    | 9.7    |
| 2008 | 11.4 | 3.2    | 34.4 | 10.8   | 423.2 | 155.3  | 15.8 | 7.6    | 53    | 8.4    |
| 2009 | 19.2 | 4.1    | 33.4 | 9.1    | 435.8 | 146.2  | 15.2 | 3.4    | 56.9  | 9.6    |
| 2010 | 12.8 | 3      | 29.9 | 7.4    | 417.8 | 135    | 12.5 | 3.2    | 59    | 0.7    |
| 2011 | 15.9 | 3.4    | 28.5 | 7.9    | 419.2 | 151.6  | 12.1 | 6.3    | 51.6  | 4.2    |
| 2012 | 10.2 | 1.4    | 19.4 | 4.1    | 317.1 | 129.4  | 8.8  | 1.5    | 43.7  | 10.2   |
| 2013 | 9.2  | 1.3    | 9.5  | 2      | 251.2 | 73.4   | 6.9  | 1.5    | 36.4  | 2.9    |
| 2014 | 5.3  | 0.8    | 7.1  | 1.4    | 166.6 | 54.4   | 5.6  | 0      | 31.9  | 2.2    |
| 2015 | 4.8  | 0      | 5    | 2.5    | 135.5 | 64.6   | 5.5  | 1.5    | 20.6  | 0.7    |
| 2016 | 4.7  | 0      | 4.5  | 2.6    | 132.4 | 62     | 3.1  | 0      | 31.2  | 1.5    |
| 2017 | 3.7  | 1.2    | 4.5  | 2.2    | 82.8  | 97.6   | 3.1  | 0      | 17    | 2.3    |

MNP: Manager-Professional, OST: Officer-Service-Trade, AFF: Agriculture-Forestry-Fishery, SKL: Skilled manual labor, USL: Unskilled manual labor.



**Supplementary Table S9.** The suicide overall standardized mortality ratios of the population age 15-64 by occupational groups per 1,000,000.

| Year | MNP              |                  | OST               |                  | AFF                 |                     | SKL              |                  | USL                 |                  |
|------|------------------|------------------|-------------------|------------------|---------------------|---------------------|------------------|------------------|---------------------|------------------|
|      | Male             | Female           | Male              | Female           | Male                | Female              | Male             | Female           | Male                | Female           |
| 2003 | 16.9 (13.5-20.8) | 24.8 (14.9-37.1) | 92.1 (86.7-97.7)  | 48.9 (42.9-55.2) | 206.2 (190.5-222.6) | 198.6 (166.3-233.8) | 37 (34.2-39.9)   | 33.8 (24.9-44)   | 89.3 (80.2-98.9)    | 22.9 (14.8-32.7) |
| 2004 | 18.8 (15.2-22.8) | 42.2 (28.6-58.3) | 98.3 (92.6-104.1) | 45.3 (39.6-51.4) | 202.1 (186.4-218.3) | 190.8 (159.1-225.4) | 33.6 (31.1-36.3) | 18.8 (12.4-26.6) | 87 (78.4-96.1)      | 24.3 (16.3-34)   |
| 2005 | 24.9 (20.8-29.5) | 29.7 (20.5-40.5) | 94.8 (89.3-100.5) | 52.1 (46.7-57.8) | 194.7 (178.8-211.4) | 173.1 (142.8-206.4) | 30.7 (28.2-33.2) | 18.1 (12.5-24.8) | 72.2 (64.5-80.5)    | 22.2 (14.8-31)   |
| 2006 | 21.2 (17.3-25.6) | 30.2 (19.9-42.6) | 99.5 (93.5-105.8) | 46.9 (41.1-53)   | 178.1 (161.9-195)   | 171.5 (138.2-208.3) | 27.4 (25.1-29.9) | 18.8 (12.5-26.4) | 64.1 (56.6-72.2)    | 12.2 (6.6-19.3)  |
| 2007 | 22.8 (18.8-27.1) | 38.6 (29.6-48.9) | 96.3 (90.5-102.3) | 53.8 (48.7-59.1) | 187.7 (170.5-205.7) | 140.2 (111.6-172)   | 25.8 (23.6-28.2) | 29.7 (23.2-37.1) | 52.4 (45.8-59.4)    | 25.1 (17.8-33.8) |
| 2008 | 34.2 (30.6-38.1) | 33.6 (27.9-39.9) | 83.8 (78.8-88.9)  | 58.5 (53.4-63.8) | 172.2 (155.2-190)   | 158 (125.7-194.1)   | 28.8 (26.1-31.7) | 27.4 (18.2-38.5) | 67.1 (59.8-74.9)    | 19.1 (13.5-25.8) |
| 2009 | 44.8 (41.1-48.8) | 44.1 (38.1-50.6) | 88.7 (84.2-93.3)  | 62.8 (57.8-68)   | 141.2 (127.5-155.7) | 125.1 (98.2-155.2)  | 27.3 (24.9-29.7) | 23.1 (14.9-33)   | 69.6 (62.9-76.7)    | 15.2 (10.6-20.6) |
| 2010 | 47.4 (43.7-51.3) | 42.5 (36.3-49.1) | 92.3 (87.8-97)    | 58.7 (53.8-63.9) | 143 (129.3-157.3)   | 129.7 (100.9-162.1) | 23.7 (21.6-26)   | 15.9 (9.4-24.1)  | 59.9 (53.8-66.3)    | 13.7 (9.4-18.8)  |
| 2011 | 40.4 (37-43.9)   | 44.5 (37.9-51.6) | 87.8 (83.5-92.1)  | 58.7 (53.6-64.1) | 138.1 (124.8-152)   | 122.1 (94.4-153.3)  | 25.5 (23.4-27.8) | 14.9 (8.5-23)    | 60.8 (54.8-67)      | 12.5 (8.4-17.3)  |
| 2012 | 51.5 (47.4-55.7) | 42.1 (35.1-49.6) | 82.6 (78.3-87)    | 63.3 (57.6-69.3) | 128.1 (114.6-142.3) | 130.9 (99.1-167.1)  | 27.7 (25.3-30.1) | 26.4 (17.2-37.5) | 89 (81.3-97.1)      | 30.7 (23.5-38.8) |
| 2013 | 67.4 (62.7-72.3) | 50.2 (42.8-58.2) | 84 (79.7-88.4)    | 64.9 (59-71)     | 151.4 (135.6-168.1) | 118.3 (86.6-155)    | 33.7 (31.1-36.4) | 23 (14.4-33.7)   | 120.3 (110.9-130.2) | 37.6 (29.3-47.1) |
| 2014 | 65.6 (61-70.3)   | 52.3 (44.8-60.4) | 83.9 (79.6-88.3)  | 63.9 (58.1-70)   | 122.7 (108-138.3)   | 98.2 (68-134)       | 31.5 (29-34.1)   | 38.4 (26.9-52)   | 133.7 (123.8-144)   | 37.4 (28.9-46.9) |
| 2015 | 70.6 (65.6-75.8) | 47.5 (39.9-55.8) | 82 (77.5-86.5)    | 74.6 (67.7-81.9) | 135.2 (118.7-152.7) | 224.8 (154.6-308)   | 34.3 (31.6-37)   | 37.1 (24.8-51.9) | 128 (118.2-138.1)   | 30.9 (22.9-40.1) |
| 2016 | 75.7 (70.5-81.2) | 48.9 (41.3-57)   | 78.2 (73.9-82.7)  | 74.8 (68.1-81.9) | 129.6 (113-147.4)   | 183.4 (114.8-268)   | 32.1 (29.5-34.9) | 36 (24.1-50.3)   | 134.2 (123.9-144.8) | 33.8 (25.5-43.3) |
| 2017 | 74.1 (68.8-79.6) | 45.2 (37.9-53.2) | 76.6 (72.3-81.1)  | 72.1 (65.4-79.3) | 121.1 (105.1-138.3) | 247.4 (158.3-356.3) | 30.9 (28.3-33.7) | 21.8 (12.7-33.4) | 115.1 (105.7-124.8) | 35.6 (26.8-45.6) |

The reference populations of 2005, 2010, and 2015 were used for each five-year period (2003-2007, 2008-2012, and 2013-2017). **MNP**: Manager-Professional, **OST**: Officer-Service-Trade, **AFF**: Agriculture-Forestry-Fishery, **SKL**: Skilled manual labor, **USL**: Unskilled manual labor.

**Supplementary Table S10.** The suicide by pesticide standardized mortality ratios of the population age 15-64 by occupational groups per 1,000,000.

| Year | MNP              |                  | OST              |                   | AFF                 |                      | SKL              |                  | USL                 |                  |
|------|------------------|------------------|------------------|-------------------|---------------------|----------------------|------------------|------------------|---------------------|------------------|
|      | Male             | Female           | Male             | Female            | Male                | Female               | Male             | Female           | Male                | Female           |
| 2003 | 9.5 (5.2-15.2)   | 17.8 (5.6-36.8)  | 76 (67.1-85.6)   | 52.6 (42.9-63.3)  | 358.9 (323.4-396.2) | 275.7 (219.6-338.3)  | 31.5 (26.8-36.6) | 28.7 (16.3-44.4) | 92.9 (76.7-110.6)   | 21.1 (10-36.2)   |
| 2004 | 7.4 (3.7-12.3)   | 17.3 (4.5-38.4)  | 79.7 (70.3-89.6) | 38.2 (29.8-47.7)  | 362.1 (327.2-398.7) | 324.1 (262.2-392.6)  | 29.4 (25.1-34.2) | 17.6 (8-31)      | 80.1 (66-95.5)      | 24.3 (12.5-40)   |
| 2005 | 13.7 (7.9-20.9)  | 10.7 (1-30.8)    | 68.2 (58.6-78.4) | 32 (23.5-41.8)    | 384.2 (344.1-426.5) | 324.6 (257.7-399.1)  | 27.7 (23.1-32.7) | 15.5 (5.6-30.3)  | 58 (45.2-72.3)      | 16.7 (6.6-31.4)  |
| 2006 | 12.2 (6.5-19.7)  | 13.6 (1.3-39)    | 70 (59.3-81.6)   | 30.5 (21.5-40.9)  | 390 (344.6-438.2)   | 308.8 (238.3-388.4)  | 22.5 (18-27.4)   | 6 (0.6-17.1)     | 73.5 (57.8-91.1)    | 7.8 (1.5-19)     |
| 2007 | 13.5 (7.6-21.3)  | 0                | 69 (58.5-80.5)   | 28.6 (19.8-39)    | 417.8 (370.8-467.6) | 319.2 (241.1-408.3)  | 22.8 (18.4-27.7) | 15.1 (4.8-31.2)  | 44.1 (32.7-57.1)    | 27 (12.8-46.3)   |
| 2008 | 19.7 (13.5-27)   | 18.9 (6.8-37)    | 61.7 (51.8-72.3) | 48 (35.8-61.9)    | 408.2 (356.1-464)   | 410.8 (311.9-523.4)  | 23.9 (18.4-30)   | 26.6 (8.4-55.1)  | 71 (55-89.1)        | 26 (12.9-43.7)   |
| 2009 | 36.8 (27.7-47.2) | 27.4 (11.7-49.6) | 66.4 (55.8-78)   | 43.8 (31.7-57.8)  | 425 (371.4-482.2)   | 391 (291.1-505.7)    | 24 (18.3-30.3)   | 12.4 (1.2-35.5)  | 78.6 (61.6-97.7)    | 30.4 (16.1-49.1) |
| 2010 | 24.8 (17.5-33.3) | 25.2 (9.1-49.4)  | 60.1 (49.9-71.2) | 44.1 (30.7-60)    | 420.8 (366.3-479.1) | 416.1 (299.8-551.5)  | 19.7 (14.7-25.4) | 14.7 (1.4-42.2)  | 84.7 (66.8-104.6)   | 2.7 (0-10.7)     |
| 2011 | 34.4 (25.2-44.9) | 23.7 (9.4-44.5)  | 64.8 (53.8-76.8) | 40 (28.3-53.8)    | 420.3 (364.8-479.6) | 425.8 (312.7-556.2)  | 20 (14.9-25.8)   | 24.9 (6.5-55.4)  | 75.5 (58.6-94.6)    | 14.1 (5.1-27.7)  |
| 2012 | 29 (19.5-40.3)   | 13.8 (2.6-33.9)  | 58.9 (47.1-72.1) | 27.2 (16.6-40.5)  | 403.3 (342.5-469.1) | 451.8 (319.6-606.9)  | 18.7 (13.2-25.2) | 7.7 (0-30.1)     | 80.6 (60.7-103.4)   | 42.4 (23.1-67.5) |
| 2013 | 47.9 (31.5-67.7) | 27.3 (5.2-67)    | 51.3 (37.1-67.7) | 27.5 (13.1-47.1)  | 588.1 (487.2-698.6) | 459.1 (287.3-671)    | 25.9 (17.5-36)   | 15.3 (0-60.1)    | 123.2 (89.8-161.8)  | 22.7 (5.9-50.4)  |
| 2014 | 37.3 (21.3-57.8) | 24 (2.3-68.8)    | 50.6 (34.8-69.4) | 27.1 (10.8-51)    | 507.8 (399.4-629.2) | 609.4 (340-956.8)    | 27.8 (18-39.8)   | 0                | 145.7 (104.5-193.7) | 29 (5.5-71.1)    |
| 2015 | 42 (22.9-66.9)   | 0                | 45 (28.5-65.2)   | 62.5 (32.1-102.8) | 443.3 (332-570.6)   | 814.1 (347.7-1476)   | 32.4 (20.9-46.3) | 29.5 (0-115.8)   | 106.9 (70.4-151)    | 11.2 (0-43.9)    |
| 2016 | 43.5 (23.7-69.3) | 0                | 42.5 (26.3-62.7) | 59.8 (31.7-96.7)  | 437 (323.2-568)     | 623.4 (224.4-1222.1) | 18.7 (10.2-29.8) | 0                | 168.8 (120.6-225.2) | 18.6 (1.8-53.4)  |
| 2017 | 43.5 (21.6-73)   | 46.7 (8.8-114.5) | 52.1 (32.2-76.7) | 51.4 (25.5-86.3)  | 322.7 (220.6-444.2) | 870 (371.6-1577.4)   | 23.4 (12.8-37.3) | 0                | 112.1 (70.9-162.5)  | 26.6 (5-65.3)    |

<sup>1</sup>The reference populations of 2005, 2010, and 2015 were used for each five-year period (2003-2007, 2008-2012, and 2013-2017). **MNP**: Manager-Professional, **OST**: Officer-Service-Trade, **AFF**: Agriculture-Forestry-Fishery, **SKL**: Skilled manual labor, **USL**: Unskilled manual labor.

**Supplementary Table S11.** The time trends of three major economic indicators in percentage (%), which are the real gross domestic product (RGDP), the unemployment rate (UnR), and the rate of customers price index (CPI) from one year to the next.

| <b>Year</b> | <b>RGDP</b> | <b>UnR</b> | <b>CPI</b> |
|-------------|-------------|------------|------------|
| 2003        | 3.1         | 3.7        | 3.5        |
| 2004        | 5.2         | 3.8        | 3.6        |
| 2005        | 4.3         | 3.9        | 2.8        |
| 2006        | 5.3         | 3.6        | 2.2        |
| 2007        | 5.8         | 3.4        | 2.5        |
| 2008        | 3           | 3.3        | 4.7        |
| 2009        | 0.8         | 3.8        | 2.8        |
| 2010        | 6.8         | 3.8        | 2.9        |
| 2011        | 3.7         | 3.5        | 4          |
| 2012        | 2.4         | 3.3        | 2.2        |
| 2013        | 3.2         | 3.2        | 1.3        |
| 2014        | 3.2         | 3.6        | 1.3        |
| 2015        | 2.8         | 3.7        | 0.7        |
| 2016        | 2.9         | 3.8        | 1          |
| 2017        | 3.2         | 3.8        | 1.9        |

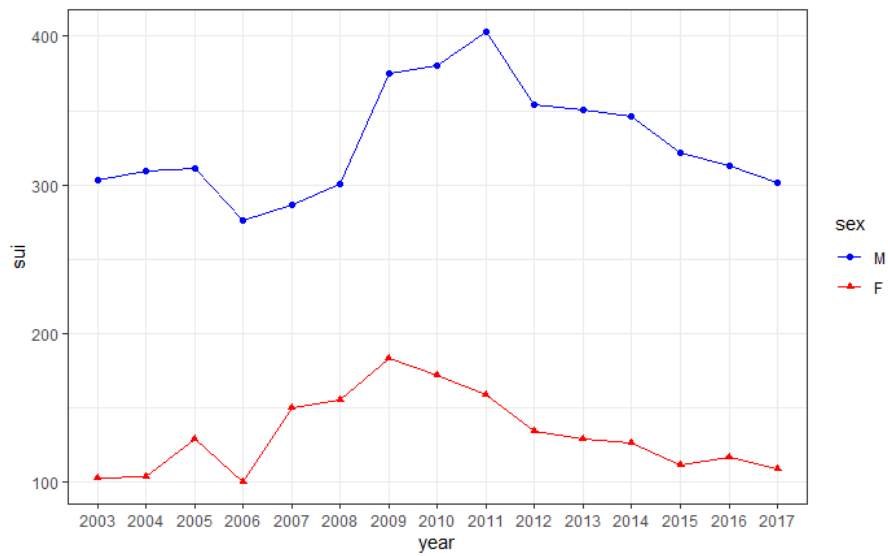

(a) Crude rates of overall suicide by sex

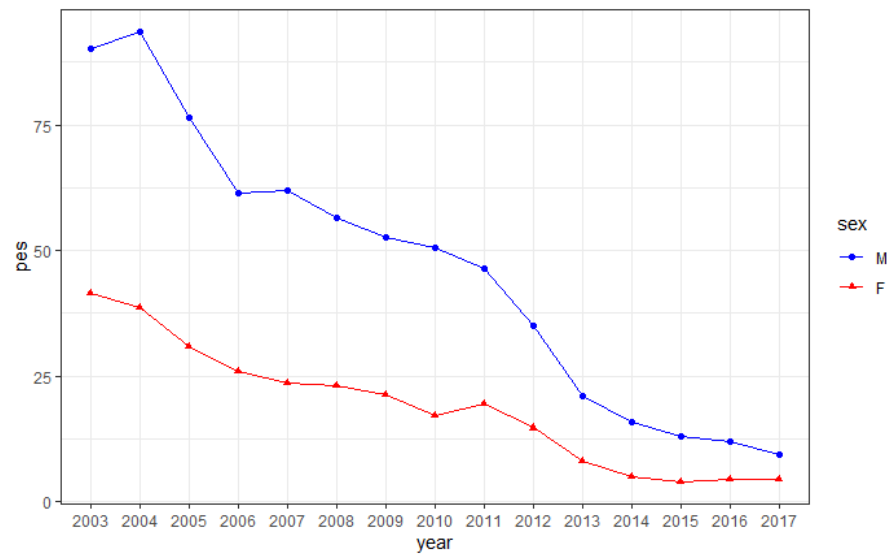

(b) Crude rates of suicide by pesticide by sex

**Supplementary Figure 1.** The overall suicide and suicide by pesticide rates by sex of the population age 15-64, including workers and non-workers, per 1,000,000.

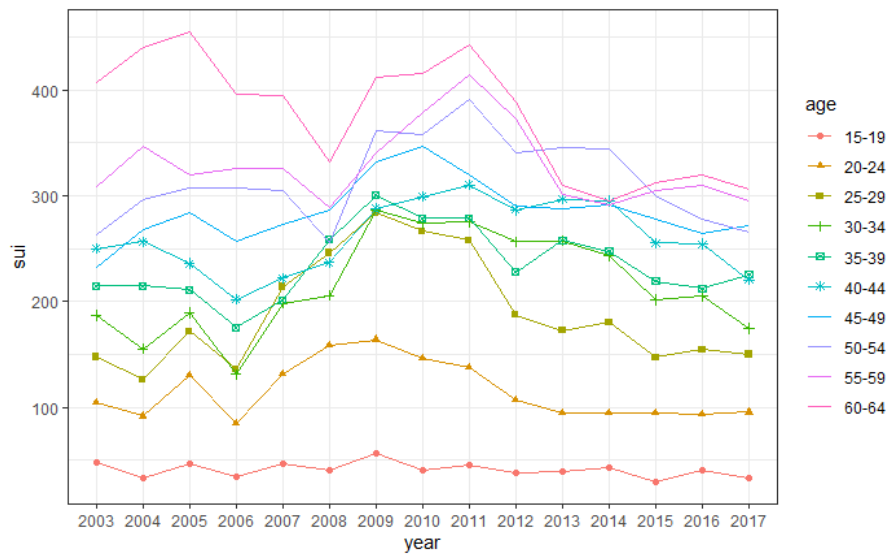

(a) Crude rates of suicide overall by age

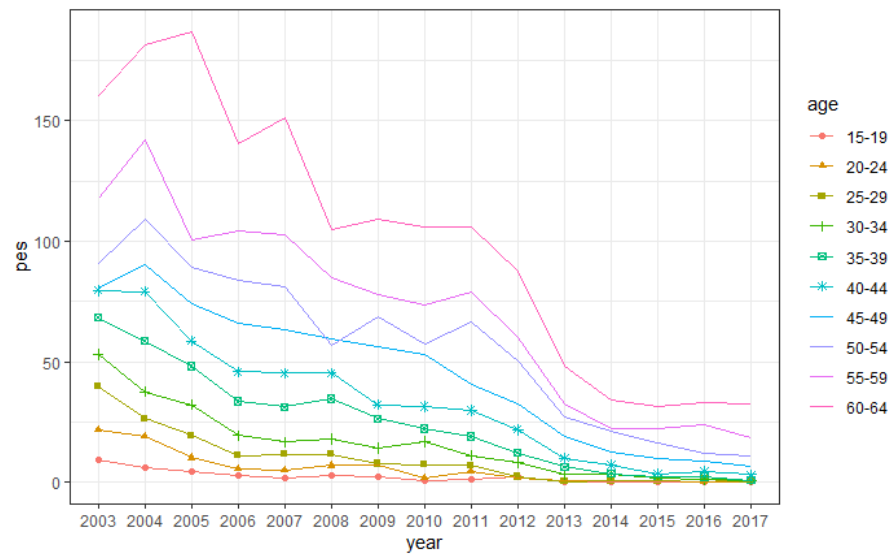

(b) Crude rates of suicide by pesticide by age

**Supplementary Figure 2.** The suicide overall and suicide by pesticide rates by age of the population age 15-64, including workers and non-workers, per 1,000,000.
